# Supplementary material for: High prevalence of low-allele-fraction somatic mutations in STAT3 in peripheral blood CD8+ cells in multiple sclerosis patients and controls
Source: PubMed Central journal article supplement (PMC9704626; doi:10.1371/journal.pone.0278245), 2022-11-28

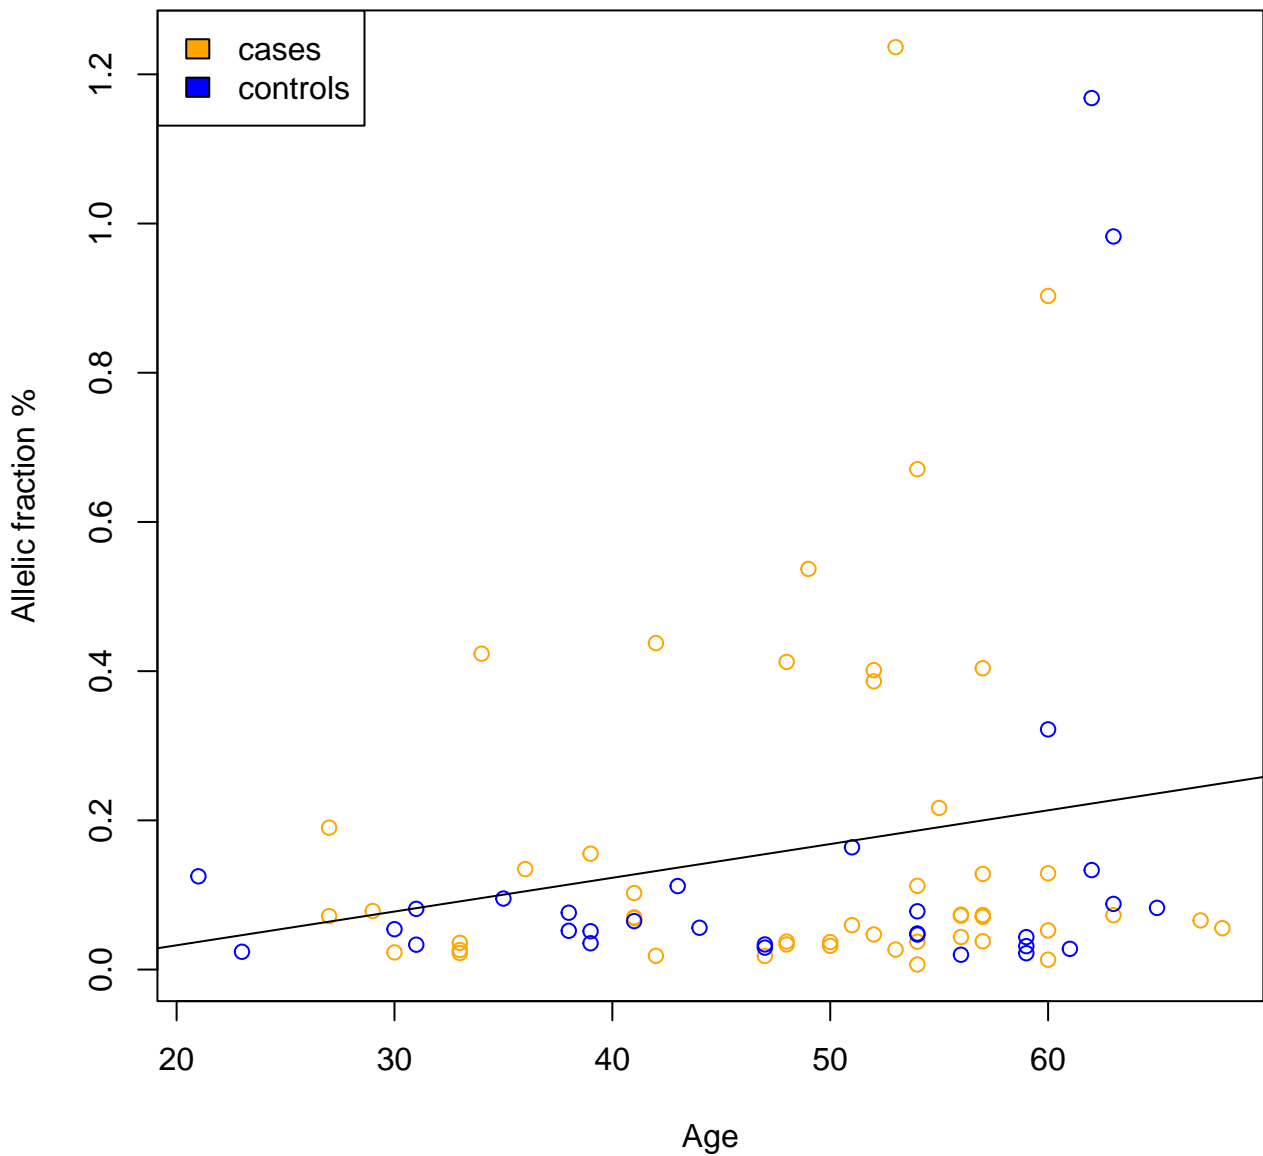

Supplement: pone.0278245.s003.pdf [file pone.0278245.s003.pdf]
